# Supplementary material for: A responsive supramolecular metallogel constructed by coordination-driven self-assembly of a crown ether-based [3]pseudorotaxane and a diplatinum(ii) acceptor
Source: Royal Society of Chemistry journal article supplement (doi:10.1039/c5dt00629e), 2015-01-01
Supplement: c5dt00629e1.pdf [file c5dt00629e1.pdf]

## A responsive supramolecular metallogel constructed by coordination-driven self-assembly of a crown ether-based [3]pseudorotaxane and diplatinum(II) acceptor

Hao Xing, Hu Wang, Xuzhou Yan\* and Xiaofan Ji\*

*Department of Chemistry, Zhejiang University, Hangzhou 310027, P. R. China,*

Fax and Tel: +86-571-8795-3189; Email address: xzyan@zju.edu.cn; xiaofanji@zju.edu.cn.

### Electronic Supplementary Information (9 pages)

|                                                                                                                                                                                |    |
|--------------------------------------------------------------------------------------------------------------------------------------------------------------------------------|----|
| 1. <i>Materials and methods</i>                                                                                                                                                | S2 |
| 2. <i><sup>1</sup>H NMR spectra of 1 and 2</i>                                                                                                                                 | S3 |
| 3. <i>Partial NOESY NMR spectrum of the [3]pseudorotaxane in acetone</i>                                                                                                       | S4 |
| 4. <i>The absorption spectral changes of 1 upon addition of 2</i>                                                                                                              | S5 |
| 5. <i>Partial DOSY NMR spectra of 1 + 2 and 1 + 2 + 3</i>                                                                                                                      | S6 |
| 6. <i>Partial <sup>1</sup>H NMR spectra of the formation of the supramolecular gel upon addition of 3 and the destruction of the supramolecular gel upon addition of TBABr</i> | S7 |
| 7. <i>Partial <sup>1</sup>H NMR spectra of the formation of the coordination polymer and the equimolar mixtures of 1 and 3 with successive addition of 2</i>                   | S8 |
| 8. <i>Variable temperature partial <sup>1</sup>H NMR spectra of 1 + 2 + 3</i>                                                                                                  | S9 |
| 9. <i>References</i>                                                                                                                                                           | S9 |

### *1. Materials and methods*

All reagents were commercially available and used as supplied without further purification. Compounds **1**,<sup>S1</sup> **2**,<sup>S2</sup> and **3**<sup>S3</sup> were synthesized by published literature procedures. NMR spectra were recorded with a Bruker Avance DMX 500 spectrophotometer with use of the deuterated solvent as the lock and the residual solvent or TMS as the internal reference. UV-vis spectroscopy was performed on a Shimadzu UV-2550 instrument at room temperature. Dynamic light scattering (DLS) was carried out on a Malvern Nanosizer S instrument at room temperature. Scanning electron microscopy (SEM) investigations were carried out on a JEOL 6390LV instrument.

2.  $^1\text{H}$  NMR spectra of **1** and **2**

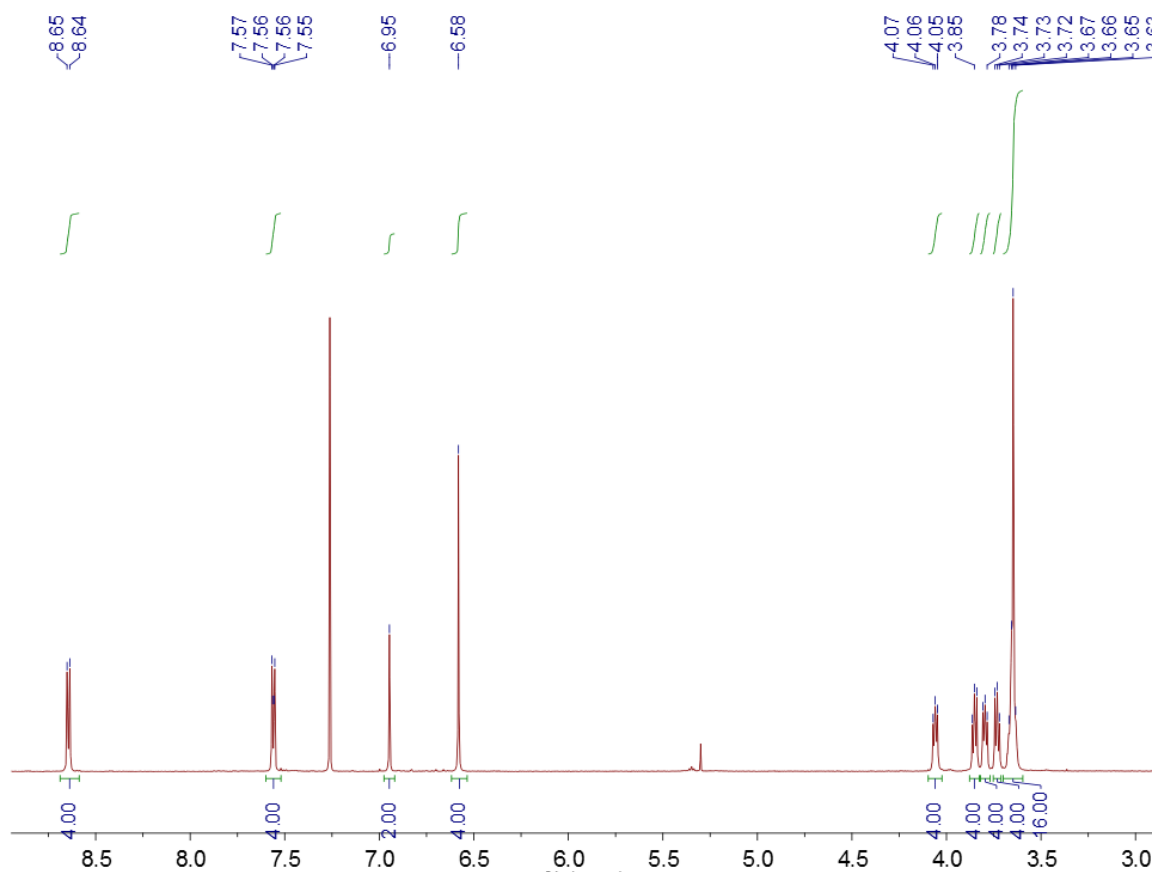

Figure S1.  $^1\text{H}$  NMR spectrum (500 MHz,  $\text{CDCl}_3$ , 293 K) of **1**.

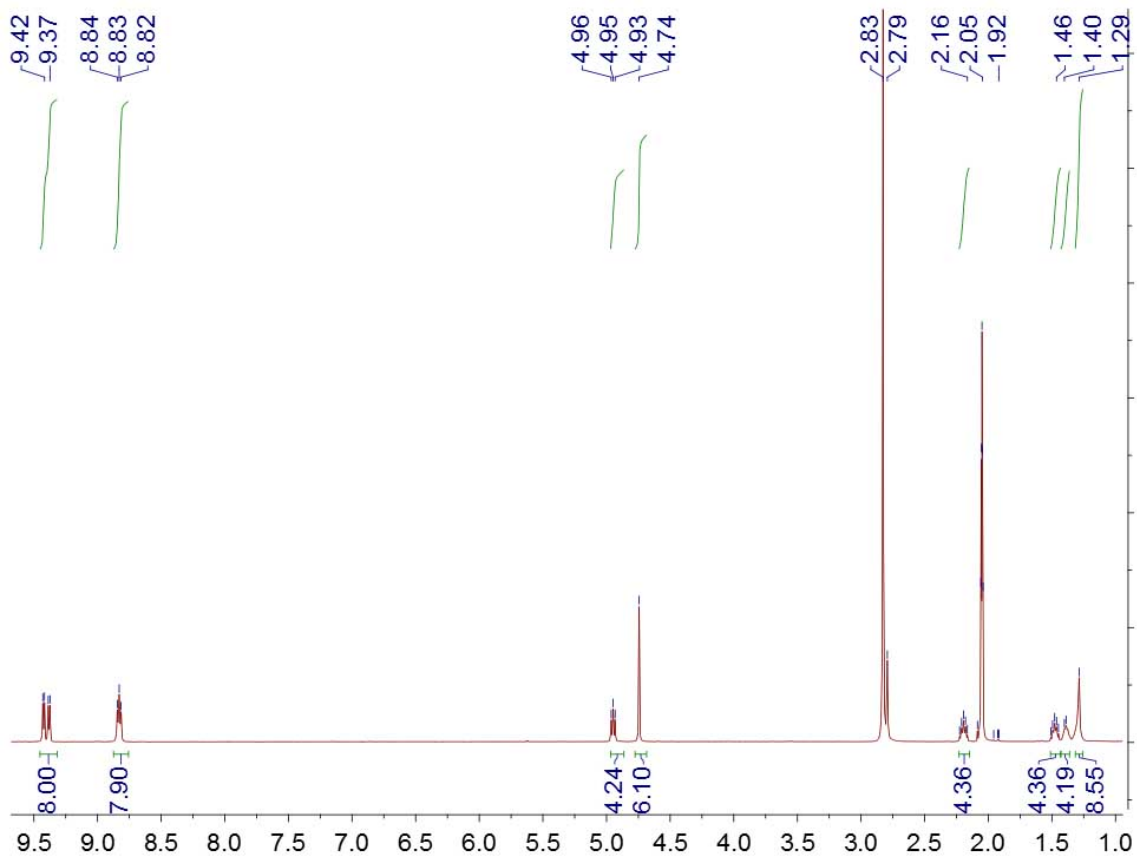

Figure S2.  $^1\text{H}$  NMR spectrum (500 MHz,  $\text{acetone-}d_6$ , 293 K) of **2**.

### 3. Partial NOESY NMR spectrum of 1 $\rightarrow$ 2 in acetone

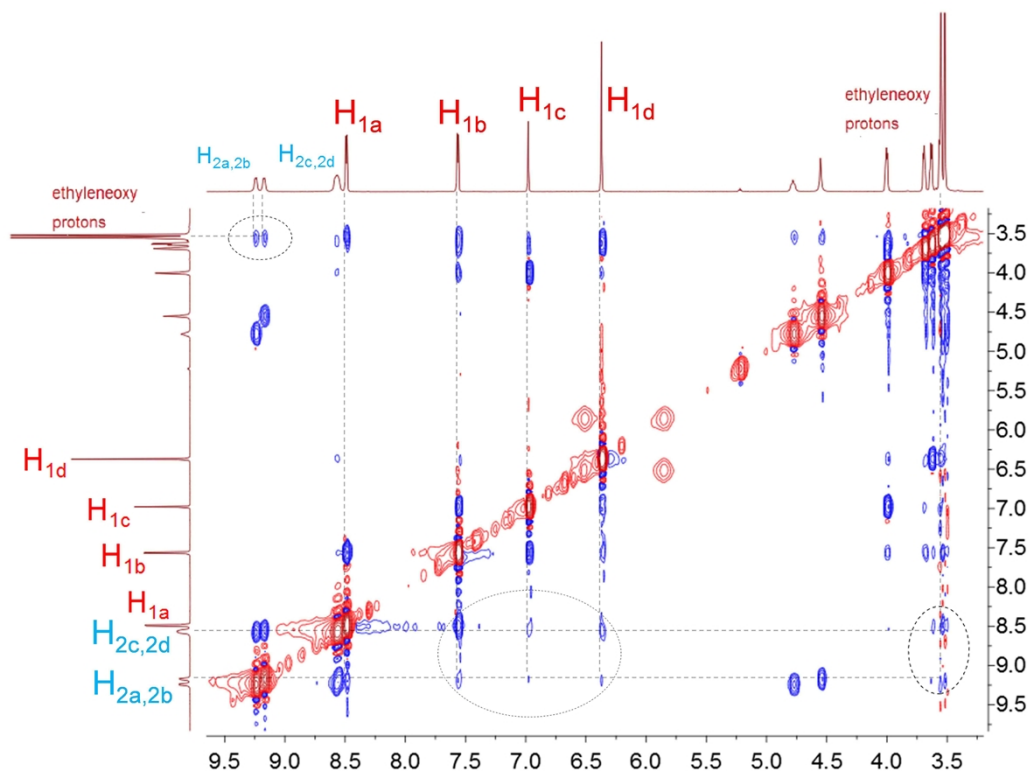

**Figure S3.** Partial NOESY NMR spectrum (500 MHz, acetone- $d_6$ , 293 K) of a mixture of **1** and **2** at 5.00 mM.

From this NOESY NMR spectrum, strong correlations are observed between the aromatic protons  $H_{1a-d}$  and the ethyleneoxy protons of the host and the pyridinium protons  $H_{2a-d}$  of the guest, confirming the occurrence of crown ether/paraquat complexation in acetone.

4. The absorption spectral changes of **1** upon addition of **2**

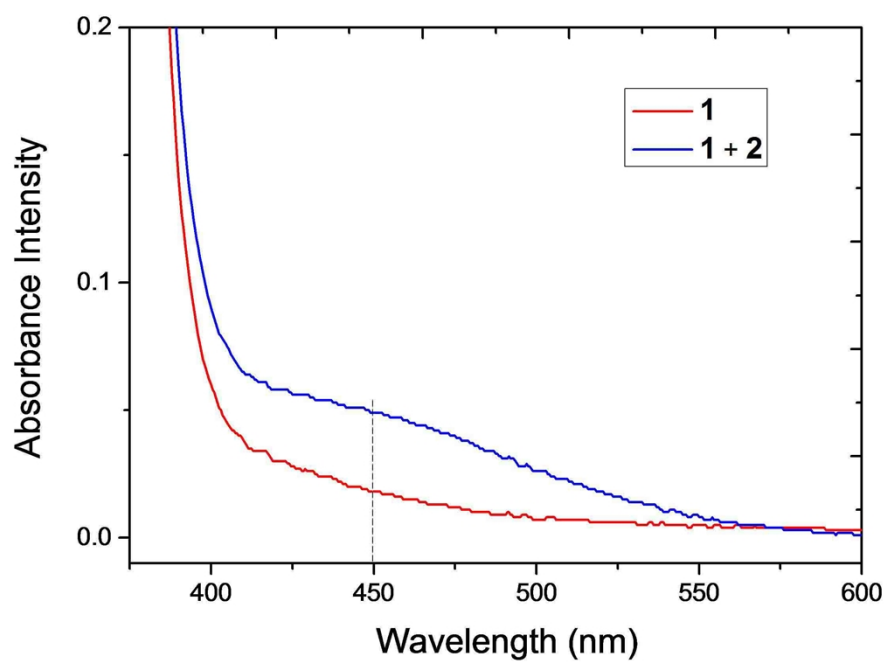

**Fig. S4** The absorption spectral changes of **1** (5.00 mM) upon addition of **2** (5.00 mM) in acetone.

5. Partial DOSY NMR spectra of **1** + **2** and **1** + **2** + **3**

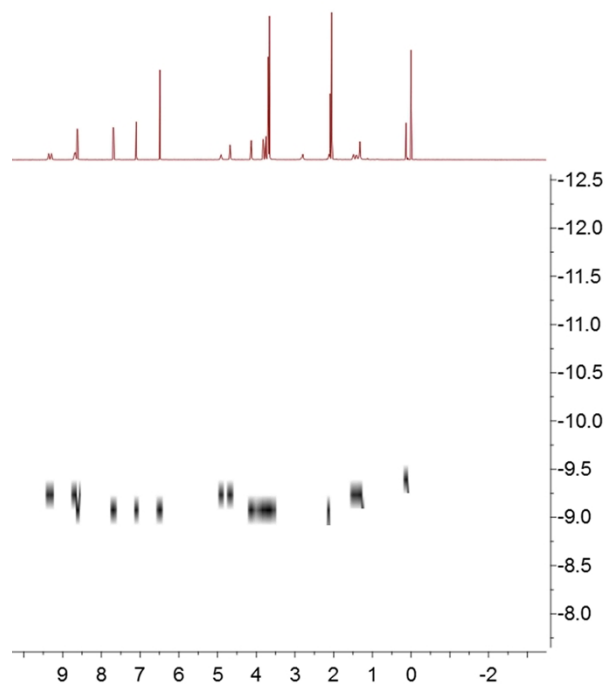

**Fig. S5** Partial DOSY NMR spectrum (500 MHz, acetone- $d_6$ , 293 K) of a mixture of **1** and **2** at 5.00 mM.

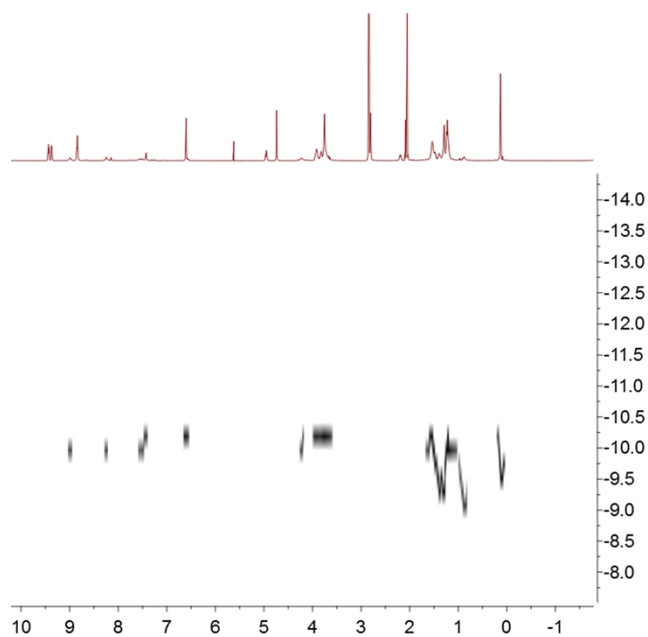

**Fig. S6** Partial DOSY NMR spectrum (500 MHz, acetone- $d_6$ , 293 K) of a mixture of **1**, **2** and **3** at 5.00 mM.

According to the literature, we used the Stokes-Einstein relation to estimate the average degree of polymerization DP(DOSY)  $\approx (D(\text{polymer}) / D(\text{monomer}))^3 = 8000$ . We think this data is unreasonable so we do not plan to put this data in our manuscript.

6. Partial  $^1\text{H}$  NMR spectra of the formation of the supramolecular gel upon addition of **3** and the destruction of the supramolecular gel upon addition of TBABr

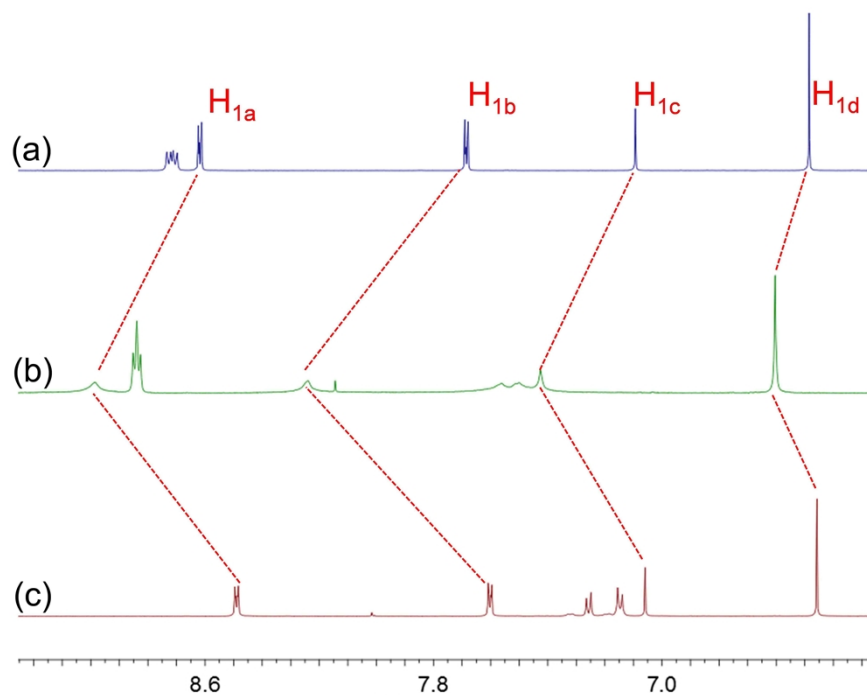

**Fig. S7** Partial  $^1\text{H}$  NMR spectra (500 MHz, acetone- $d_6$ , 293 K): (a) a mixture of **1** and **2** at 5.00 mM; (b) a mixture of **1**, **2** and **3** at 5.00 mM; (c) a mixture of **1**, **2**, **3**, and TBABr at 5.00 mM.

7. Partial  $^1\text{H}$  NMR spectra of the formation of the coordination polymer and equimolar mixtures of **1** and **3** with successive addition of **2**

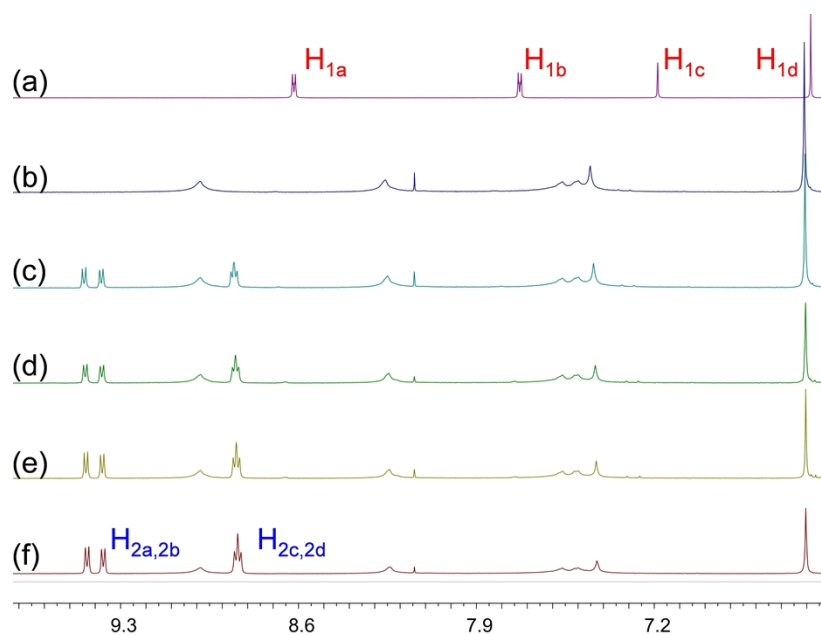

**Fig. S8** Partial  $^1\text{H}$  NMR spectra (500 MHz, acetone- $d_6$ , 293 K) of (a) **1** at 5.00 mM and equimolar mixtures of **1** and **3** at a concentration of 5 mM with successive addition of **2**: (b) 0 equiv.; (c) 0.2 equiv.; (d) 0.3 equiv.; (e) 0.4 equiv.; (f) 0.5 equiv.

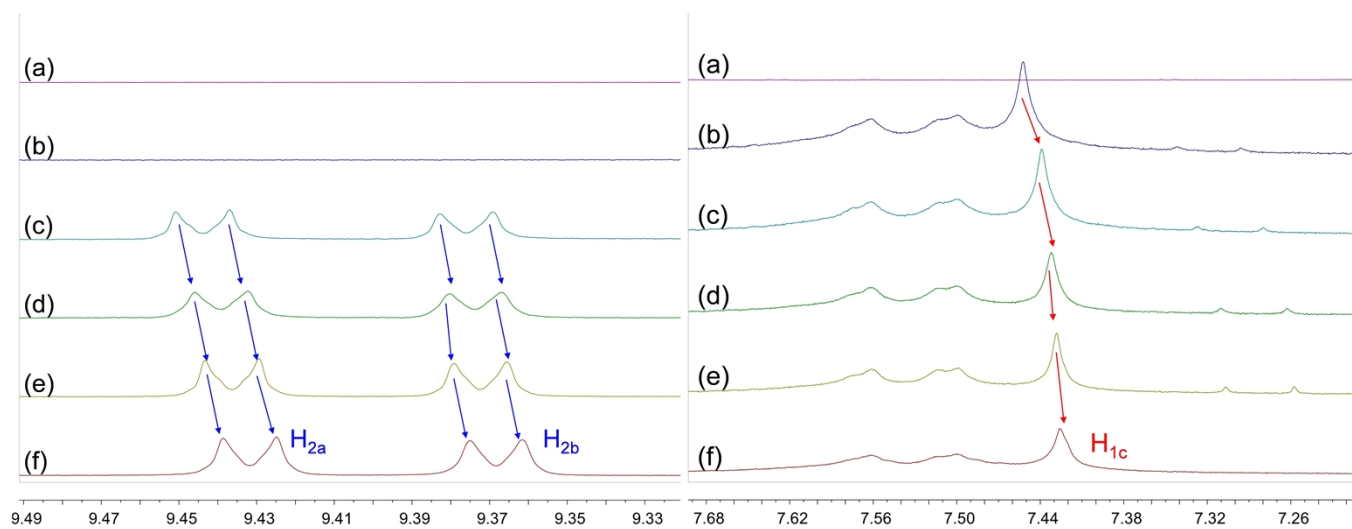

**Fig. S9** Enlarged image of Figure S8 from 9.47 to 9.33 and from 7.62 to 7.26.



## 8. Variable temperature partial $^1\text{H}$ NMR spectra of **1** + **2** + **3**

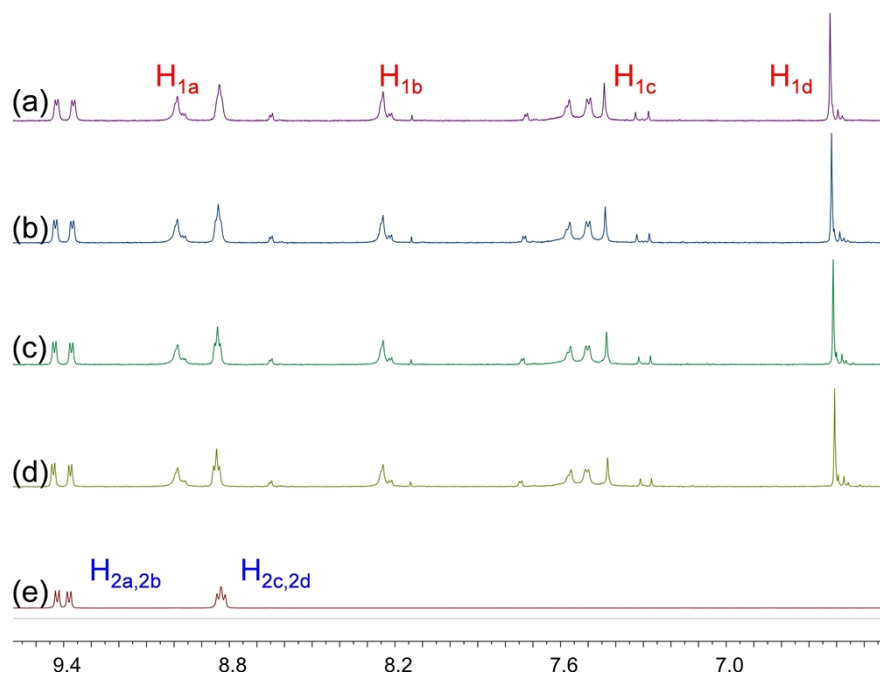

**Fig. S10** Variable temperature partial  $^1\text{H}$  NMR spectra of **1** + **2** + **3** (5.00 mM, acetone- $d_6$ , 600 MHz): (a) 313 K; (b) 308 K; (c) 303 K; (d) 298 K and (e) **2** at 5.00 mM at 298 K.

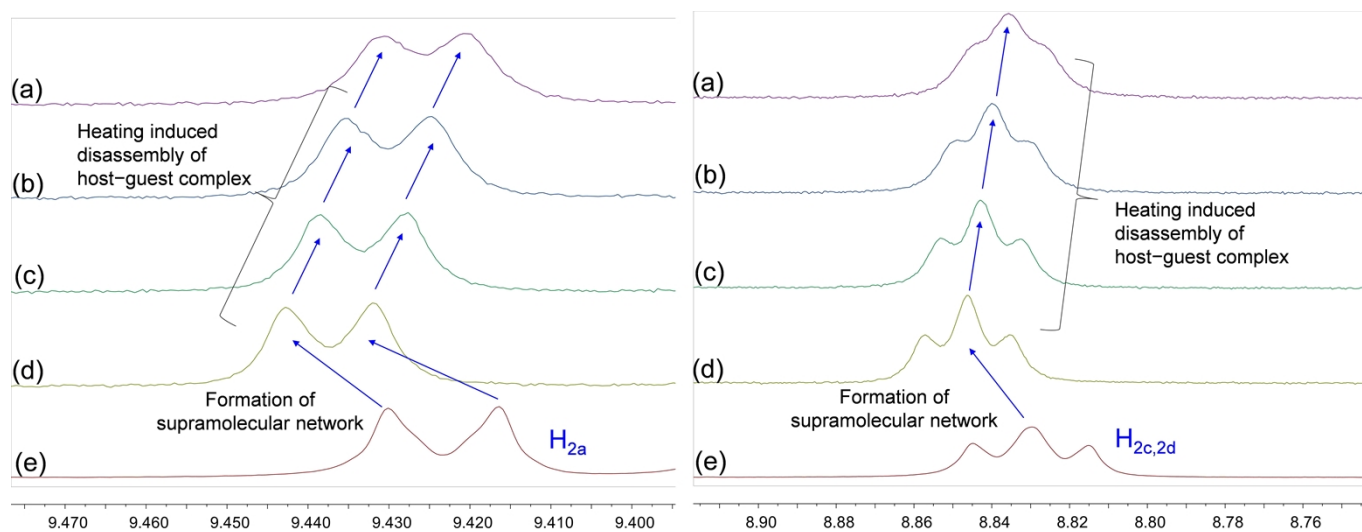

**Fig. S11** Enlarged image of Figure S10 from 9.47 to 9.41 and from 8.88 to 8.80.

### References:

- S1. H. Xing, P. Wei and X. Yan, *Org. Lett.* 2014, **16**, 2850–2853.
- S2. F. Wang, B. Zheng, K. Zhu, Q. Zhou, C. Zhai, S. Li, N. Li and F. Huang, *Chem. Commun.* 2009, 4375–4377.
- J. Manna, C. J. Kuehl, J. A. Whiteford, P. J. Stang, D. C. Muddiman, S. A. Hofstadler and R. D. Smith, *J. Am. Chem. Soc.* 1997, **119**, 11611–11619.
